# Supplementary material for: Evaluation of the self-sampling for cervical cancer screening in Bolivia
Source: Springer Nature journal article supplement (doi:10.1186/s12889-019-6401-5), 2019-01-17
Supplement: MOESM1 [file 16403166]

## KNOWLEDGE QUESTIONS

### 1. –How old are you?

- a. - 20 to 29
- b. - 30 to 39
- c. - 40 to 49
- d. - 50 to 59
- e. - More than 59

### 2. - What level of education did you reach?

- a. - Primary or lower
- b. - High school
- c. - University
- d. - Other, please specify...
- e. - No response

### 3. - What do you know about cervical cancer? (Check all that apply)

- a. - It is a cancer that most often affects middle-aged or older women
- b. - It is a cancer that mostly affects younger women
- c. - It is a cancer that affects the lower genital tract of women
- d. - Persistent infection with some types of Human Papilloma Virus (HPV) causes cervical cancer
- e. - Cervical cancer is the second most common cancer among women worldwide
- f. - Only sexually active women can develop cervical cancer
- g. - Do not know

### 4. - What do you know about cervical cancer prevention? (Check all that apply)

- a. - Regular search or screening can prevent cancer almost entirely
- b. - Doing my Pap test
- c. - Doing my HPV test
- d. - Receiving vaccine against HPV

e. - The danger of getting cervical cancer decreases if my partner uses condoms during sexual intercourse.

f. - Do not know

g. - No response

**5. - What do you know about the Human Papilloma Virus (HPV)? (Check all that apply)**

a. - HPV is a sexually transmitted virus

b. - Not all HPV infections can lead to cancer

c. - Both, men and women can contract HPV sexually

d. - A positive HPV test is usually not followed by symptoms

e. - Others, please specify

f. - Do not know

g.- No response

**6.-What do you know about Human Papilloma Virus (HPV) prevention? (Check all that apply)**

a. - Condom use when having sexual intercourse can decrease the probability of acquiring HPV

b. - The use of condoms helps avoid sexually transmitted diseases such as HIV, chlamydia, fungal vaginal infection, etc.

c. - Having only one or a few partners can reduce the probability of getting infected by HPV

d. - Others, please specify...

e. - Do not know
